# Supplementary material for: Artificial intelligence to empower diagnosis of myelodysplastic syndromes by multiparametric flow cytometry
Source: PubMed Central journal article supplement — Haematologica. 2023 Mar 16;108(9):2435–43. doi: 10.3324/haematol.2022.282370 (PMC10483367; doi:10.3324/haematol.2022.282370), 2023-03-16
Supplement: 2022_282370_CLICHET_SUPPL.pdf [file 2022_282370_CLICHET_SUPPL.pdf]

# Artificial intelligence to empower diagnosis of myelodysplastic syndromes by multiparametric flow cytometry

Valentin Clichet,<sup>1</sup> Delphine Lebon,<sup>2,3</sup> Nicolas Chapuis,<sup>4</sup> Jaja Zhu,<sup>5</sup> Valérie Bardet,<sup>5</sup> Jean-Pierre Marolleau,<sup>2,3</sup> Loïc Garçon,<sup>1,3</sup> Alexis Caulier<sup>2,3,6,7</sup> and Thomas Boyer<sup>1,3</sup>

<sup>1</sup>Service d'Hématologie Biologique, CHU Amiens-Picardie, Amiens, France; <sup>2</sup>Service d'Hématologie Clinique et de Thérapie Cellulaire, CHU Amiens-Picardie, Amiens, France; <sup>3</sup>HEMATIM, EA 4666, Université Picardie Jules Verne, Amiens, France; <sup>4</sup>Assistance Publique-Hôpitaux de Paris, Centre-Université Paris Cité, Service d'Hématologie Biologique, Hôpital Cochin, Paris, France; <sup>5</sup>Service d'Hématologie-Immunologie-Transfusion, CHU Ambroise Paré, INSERM UMR 1184, AP-HP, Université Paris Saclay, 92100 Boulogne Billancourt, France; <sup>6</sup>Broad Institute of MIT and Harvard, Cambridge, MA, USA and <sup>7</sup>Division of Hematology/Oncology, Boston Children's Hospital, Harvard Medical School, Cambridge, MA, USA

**Correspondence:** T. Boyer  
[boyer.thomas@chu-amiens.fr](mailto:boyer.thomas@chu-amiens.fr)

**Received:** November 3, 2022.

**Accepted:** March 7, 2023.

**Early view:** March 16, 2023.

<https://doi.org/10.3324/haematol.2022.282370>

©2023 Ferrata Storti Foundation

Published under a CC BY-NC license

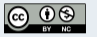

**Supplement Table S1 : Antibodies used in multicolor flow cytometry analysis in Amiens hospital**

**Supplement Table S2 : Antibodies used in multicolor flow cytometry analysis in Ambroise Paré hospital**

**Supplement Table S3 : Antibodies used in multicolor flow cytometry analysis in Cochin hospital**

**Supplement Table S1 : Antibodies used in multicolor flow cytometry analysis in Amiens hospital**

| <b>Antibody</b> | <b>clone</b> | <b>manufacturer</b> |
|-----------------|--------------|---------------------|
| CD7 FITC        | 8H8.1        | Beckman Coulter     |
| CD13 PE         | SJ1D1        | Beckman Coulter     |
| HLA-DR ECD      | Immu-357     | Beckman Coulter     |
| CD33 PC5.5      | D3HL60.251   | Beckman Coulter     |
| CD38 PeCy7      | HB7          | Beckman Coulter     |
| CD34 APC        | 581          | Beckman Coulter     |
| CD56 APC-A700   | N901         | Beckman Coulter     |
| CD19 APC-A750   | J3-119       | Beckman Coulter     |
| CD117 PB        | 104D2        | Beckman Coulter     |
| CD45 KO         | J.33         | Beckman Coulter     |

**Supplement Table S2 : Antibodies used in multicolor flow cytometry analysis in Ambroise Paré hospital**

| <b>Antibody</b>   | <b>clone</b> | <b>manufacturer</b> |
|-------------------|--------------|---------------------|
| CD64 PE           | 22           | Becton Dickinson    |
| CD123 PerCP-Cy5.5 | 7G3          | Becton Dickinson    |
| CD38 PeCy7        | HB7          | Becton Dickinson    |
| CD34 APC          | 8G12         | Becton Dickinson    |
| CD19 APC-H7       | SJ25C1       | Becton Dickinson    |
| CD7 APC-R700      | M-T701       | Becton Dickinson    |
| CD45V500          | HI30         | Becton Dickinson    |
| CD56 BV605        | NCAM 16.2    | Becton Dickinson    |
| CD10 BV711        | HI10a        | Becton Dickinson    |

**Supplement Table S3 : Antibodies used in multicolor flow cytometry analysis in Cochin hospital**

| <b>Antibody</b> | <b>clone</b> | <b>manufacturer</b> |
|-----------------|--------------|---------------------|
| CD7 FITC        | 8H8.1        | Beckman Coulter     |
| CD56 PE         | N901         | Beckman Coulter     |
| CD19 ECD        | J3-119       | Beckman Coulter     |
| CD33 APC        | D3HL60.251   | Beckman Coulter     |
| CD34 APC-A700   | 581          | Beckman Coulter     |
| CD10 APC-A750   | ALB1         | Beckman Coulter     |
| CD45 KO         | J.33         | Beckman Coulter     |
